# Supplementary material
Source: Research Square preprint supplement (doi:10.21203/rs.3.rs-9191572/v1)
Supplement: Supplementary file 1 [file 8b7144eee33cc1665379e8ba.docx]

**Supplementary Material**

**Supplementary Tables.**

**Supplementary Table 1. Anthropometric measures. Female newborns**

| Gestational Age | Weight (grams) Mean (SD) | Length (cm)  Mean (SD) | Head Circumference (cm)  Mean (SD) |
| --- | --- | --- | --- |
| 24.1 (1) | 584 | 31 | 21.5 |
| 26 | 731.4(98.0) | 30.9(2.5) | 23.1(1.3) |
| 27 | 816(193.1) | 31.8(3.3) | 23.5(2.6) |
| 28 | 855(35.4) | 35.5(0.7) | 25.5(0.7) |
| 29 | 1045.7(38.4) | 37.5(1.5) | 26.8(0.3) |
| 30 | 1438.7(707.0) | 37.7(2.1) | 28.3(3.2) |
| 31 | 1226.5(126.0) | 38.9(0.9) | 27.5(1.1) |
| 32 | 1538(228.8) | 41.0(2.1) | 30.2(1.1) |
| 33 | 2061(245.8) | 42.5(2.7) | 31.3(1.3) |
| 34 | 2053.1(314.8) | 44.4(2.3) | 31.7(1.2) |
| 35 | 2187.8(238.9) | 43.8(2.0) | 32.3(1.5) |
| 36 | 2399.9(299.9) | 45.3(1.7) | 32.5(1.2) |
| 37 | 2606(304.8) | 46.5(1.6) | 33.1(1.3) |
| 38 | 2942(319.5) | 47.9(1.8) | 33.9(1.1) |
| 39 | 3114.1(311.8) | 48.6(1.7) | 34.2(1.2) |
| 40 | 3239(326.5) | 48.9(1.5) | 34.3(1.0) |
| 41 (1) | 3261 | 47.0 | 35.5 |

**Supplementary Table 2. Anthropometric measures. Male newborns**

| Gestational Age | Weight (grams) Mean (SD) | Length (cm)  Mean (SD) | Head Circumference (cm)  Mean (SD) |
| --- | --- | --- | --- |
| 23.0 (1) | 586 | 30 | 21.5 |
| 26 | 812.0(250.8) | 34.8(3.8) | 24.3(2.0) |
| 27 | 947.5(142.4) | 36.3(2.9) | 25.5(0.7) |
| 28 | 874.3(229.0) | 33.7(1.5) | 25.3(1.3) |
| 29 | 951.5(61.5) | 34.8(0.4) | 24.8(0.4) |
| 30 | 1476.5(94.0) | 40.3(2.5) | 29.3(0.4) |
| 31 | 1533.0(157.7) | 39.7(1.4) | 29.1(1.8) |
| 32 | 1698.3(254.5) | 41.1(2.3) | 30.3(1.5) |
| 33 | 1899.2(287.9) | 43.0(1.4) | 30.7(1.5) |
| 34 | 2162.6(211.6) | 44.8(1.7) | 32.5(1.4) |
| 35 | 2275.9(259.7) | 45.0(1.6) | 32.9(1.4) |
| 36 | 2489.1(309.6) | 46.2(2.0) | 33.5(1.5) |
| 37 | 2763.6(357.7) | 47.2(1.7) | 33.8(1.3) |
| 38 | 3026.4(364.5) | 48.4(1.6) | 34.4(1.2) |
| 39 | 3203.1(331.7) | 49.0(1.7) | 34.7(1.2) |
| 40 | 3375.7(342.8) | 49.5(1.6) | 35.0(1.1) |
| 41 (1) | 3657(338.0) | 51.3(1.8) | 35.0 (0) |

**Supplementary Figure 1. Smoothed study population (HUSI) vs international postnatal GCs. Length (cm)**

**
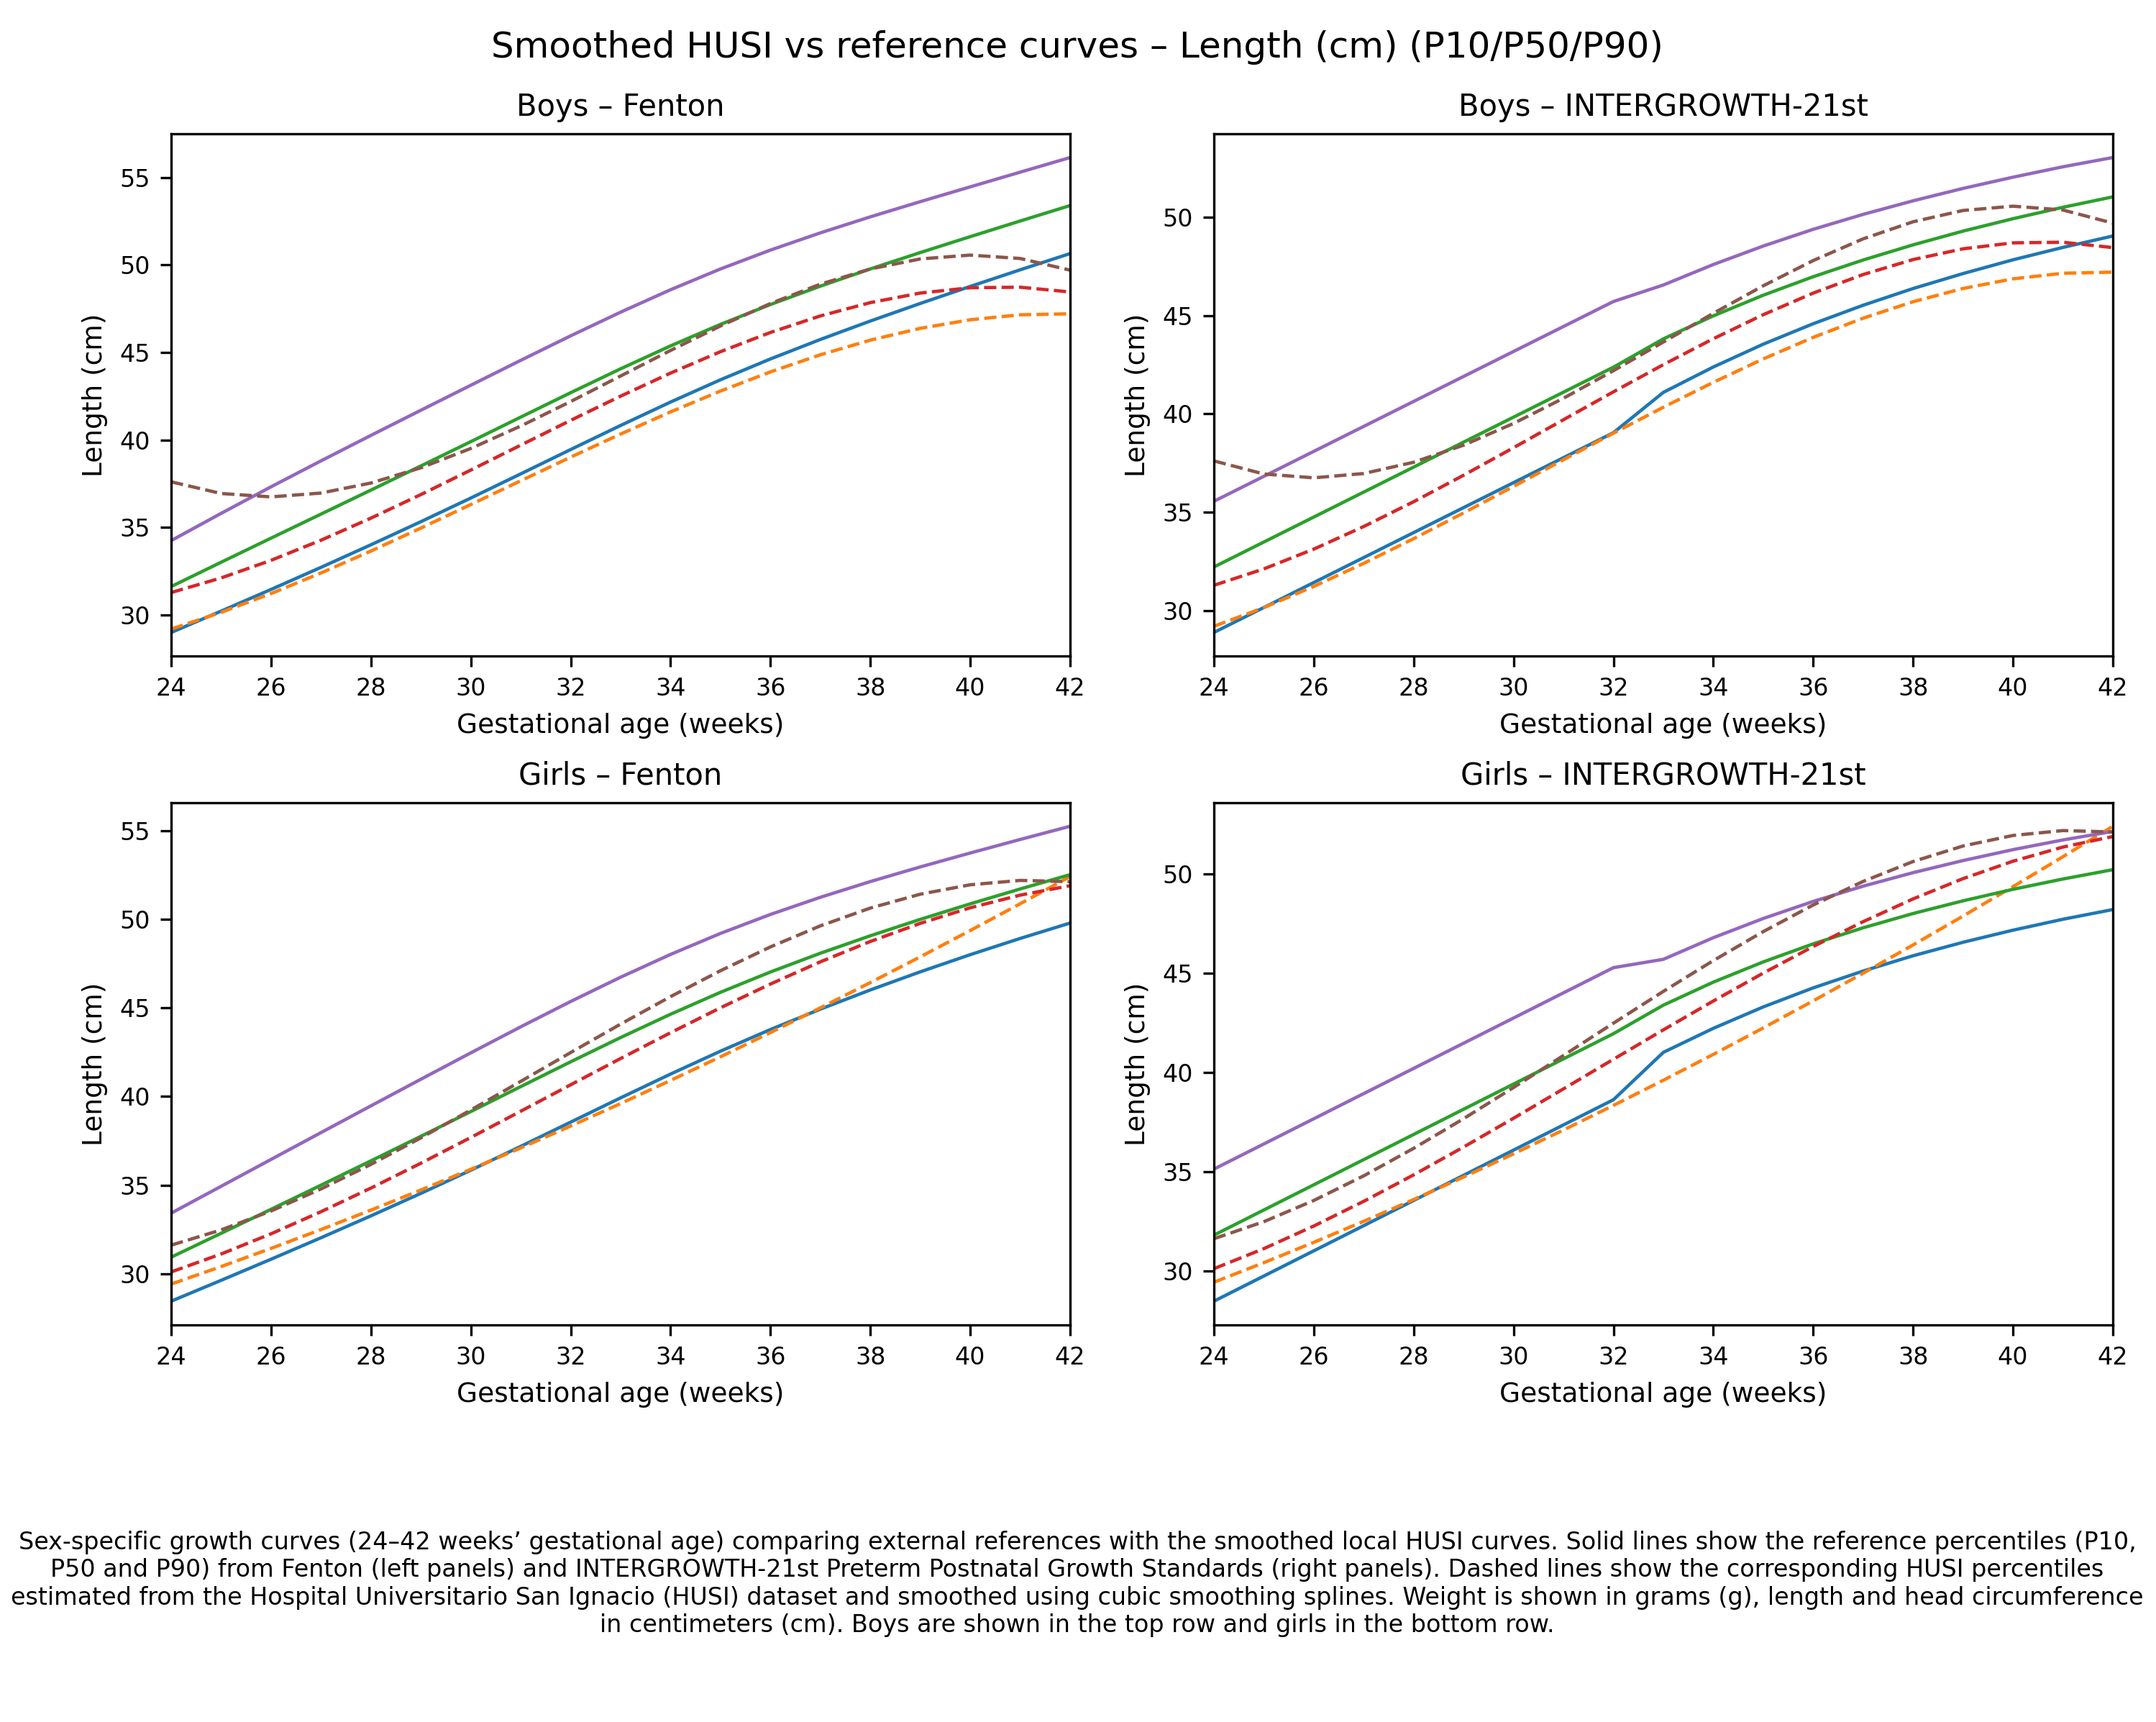
**

**Supplementary Figure 2. Smoothed study population (HUSI) vs international postnatal GCs. Head Circumference (cm)**

**
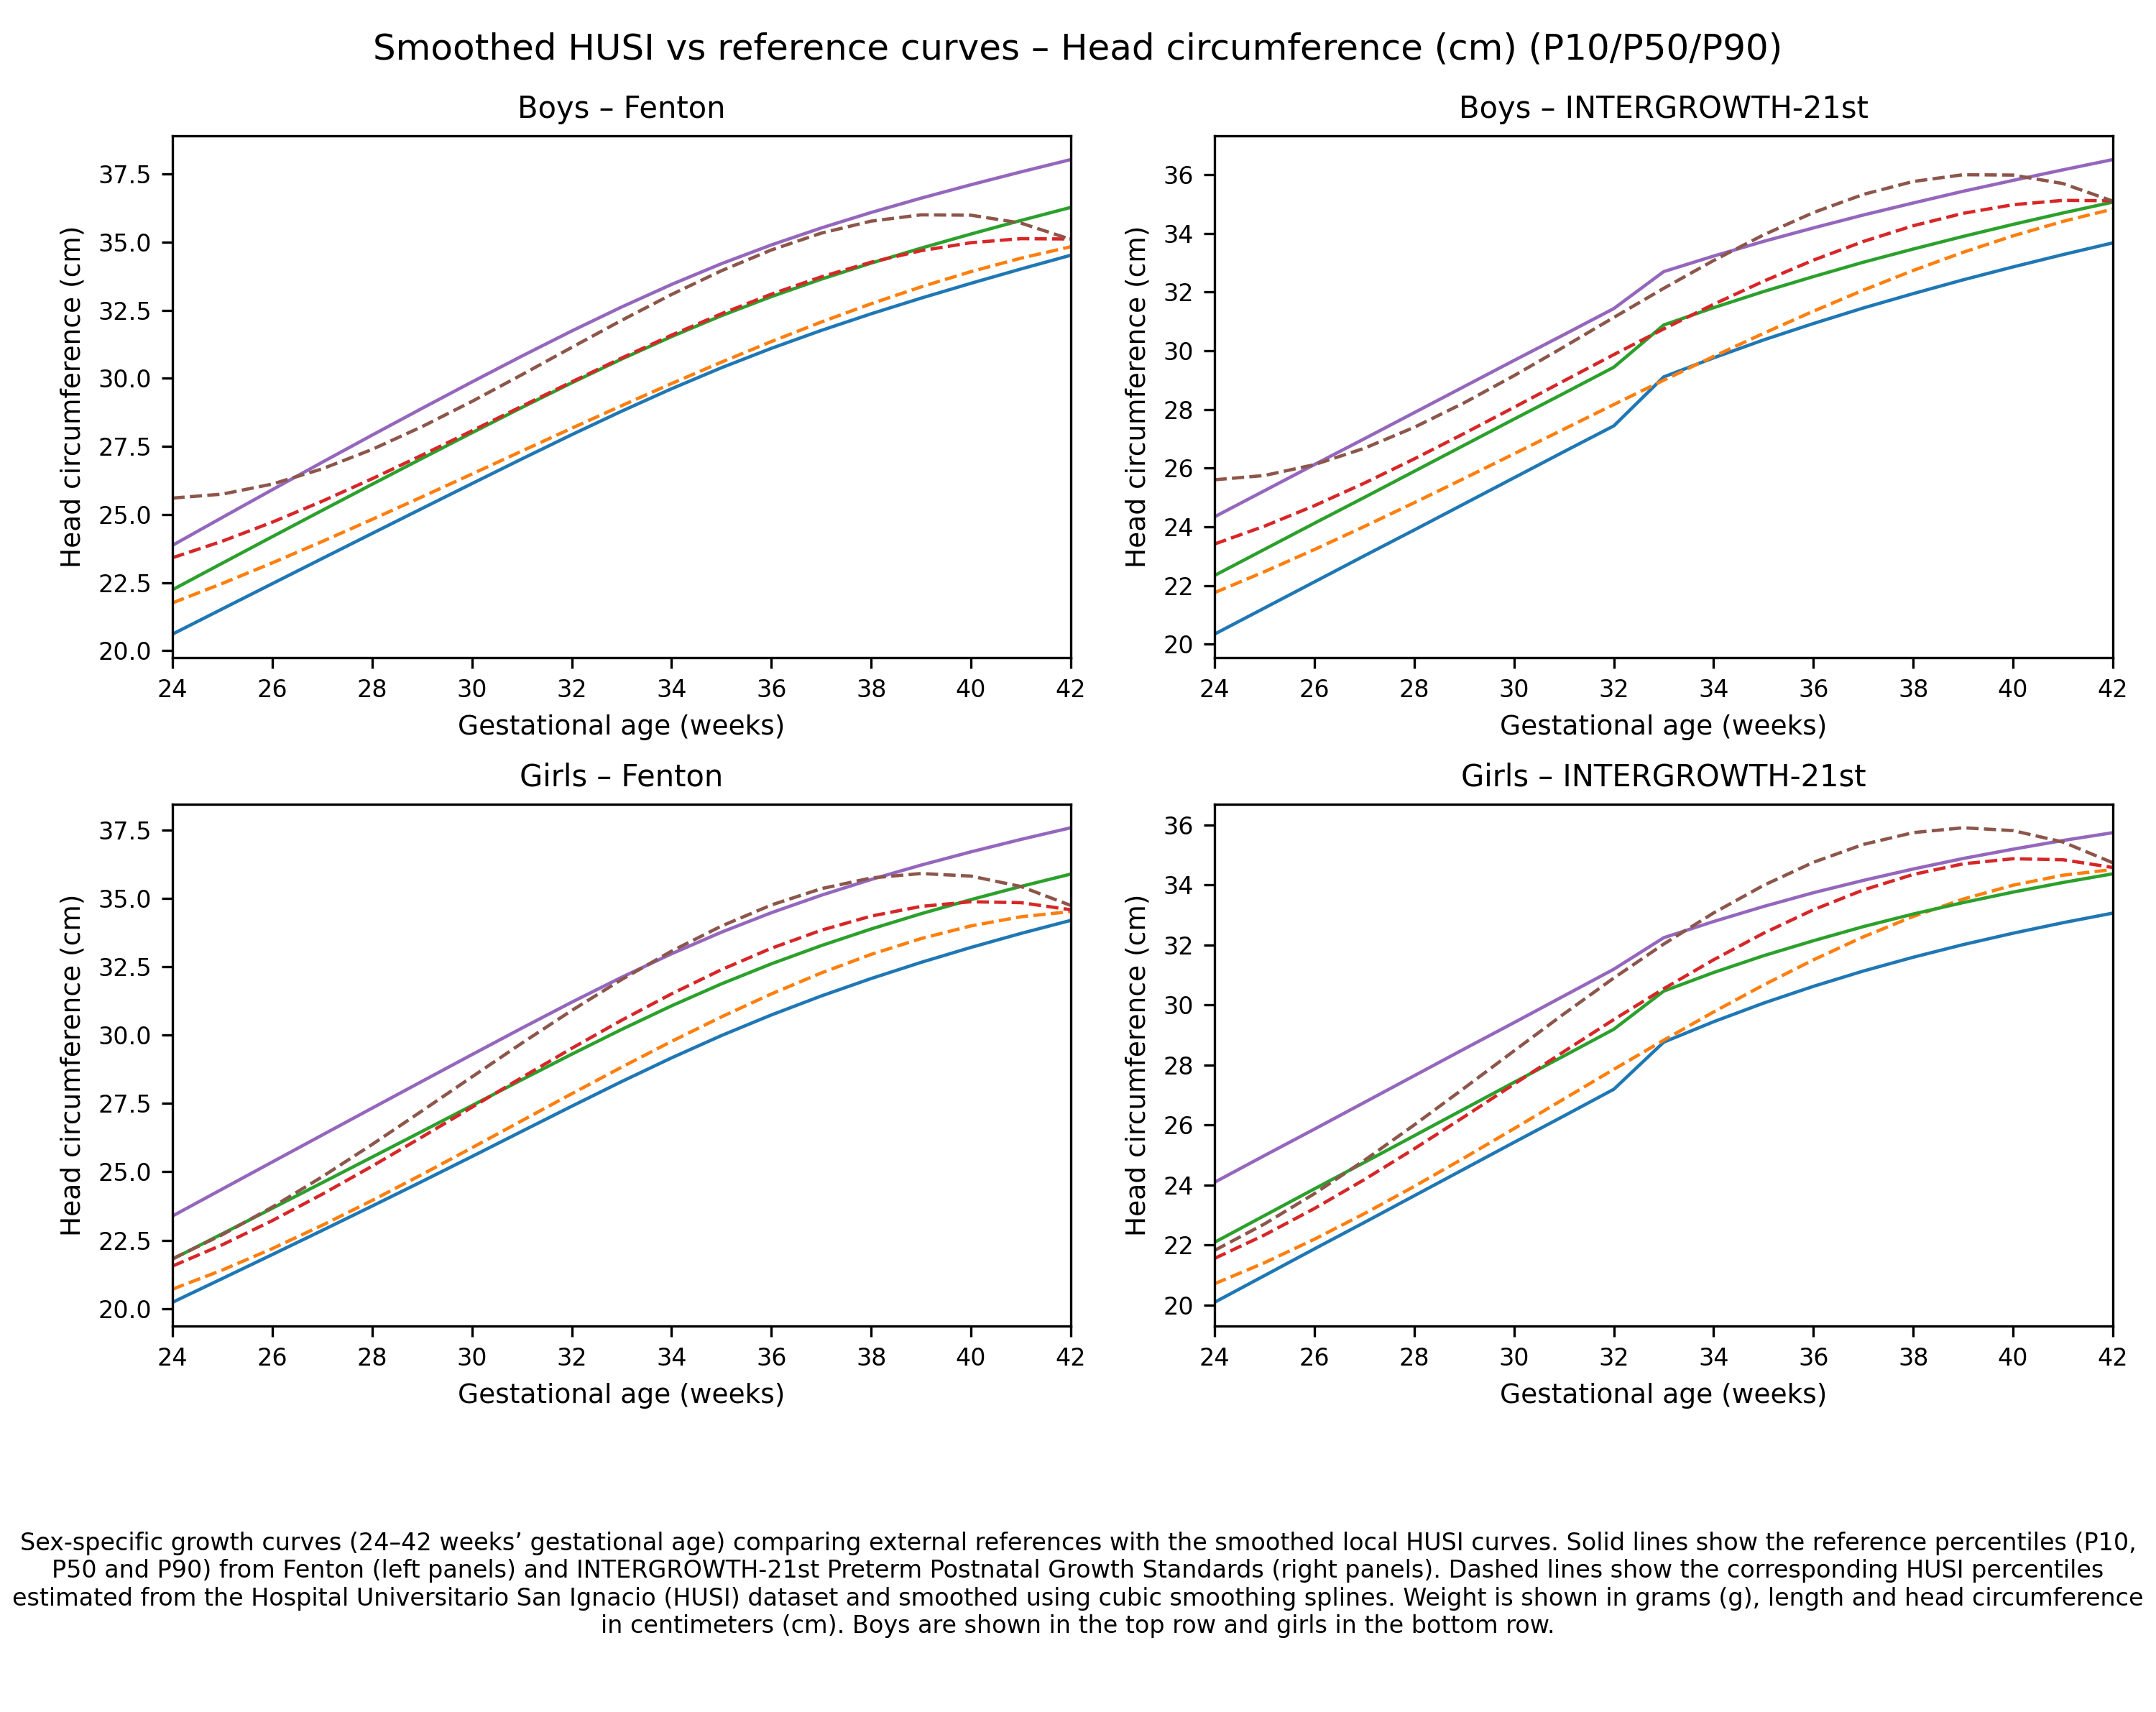
**

**Supplementary Table 3. Perinatal characteristics and main outcomes in the first month of life**

| Characteristic N=1694 | | n | (%) |
| --- | --- | --- | --- |
| Female | | 862 | 50.9 |
| Male | | 832 | 49.1 |
| Delivery room resuscitation | | 137 | 8.1 |
| Metabolic acidemia without asphyxia criteria | | 109 | 6.4 |
| Perinatal asphyxia | | 20 | 1.2 |
| RDS (surfactant deficiency) | | 77 | 4.6 |
| Transient tachypnea of the newborn | | 151 | 8.9 |
| Transient respiratory distress (resolution in the first hours of life) | | 49 | 2.9 |
| Congenital pneumonia | | 17 | 1.0 |
| Pneumothorax | | 4 | 0.2 |
| Other respiratory distresses | | 69 | 4.1 |
| Hypoglycemia | | 203 | 12.0 |
| Polycythemia | | 26 | 1.5 |
| Jaundice without incompatibility requiring phototherapy | | 411 | 24.3 |
| Early sepsis | | 72 | 4.3 |
| Late sepsis | | 40 | 2.4 |
| NEC | | 7 | 0.4 |
| Transient newborn ileus | | 75 | 4.5 |
| Feeding problems | | 185 | 10.9 |
| Required mechanical ventilation | | 63 | 3.7 |
| Required other respiratory support | | 216 | 12.8 |
| Conventional nasal cannula | | 150/216 | 69.4 |
| C-PAP | | 48/216 | 22.2 |
| Nasal ventilation | | 11/216 | 5.1 |
| High flow nasal cannula | | 7/216 | 3.2 |
| Intraventricular hemorrhage (IVH) | without IVH | 1679 | 99.1 |
| GI IVH | 6 | 0.4 |
| GII IVH | 3 | 0.2 |
| GIII IVH | 2 | 0.1 |
| GIV IVH | 4 | 0.2 |
| ROP | | 3 | 0.2 |
| BPD | | 50 | 3.0 |
| PDA with hemodynamic repercussions | | 28 | 1.7 |
| Oxygen dependency at hospital discharge without BPD | | 124 | 7.3 |
| Death | | 16 | 0.9 |
| Early neonatal death | | 12/16 | 75.0 |
| Late neonatal death | | 4/16 | 25.0 |
| Required hospitalization | | 796 | 47.0 |
| Follow-up in the Kangaroo Mother Care Program (preterm/LBW) | | 374 | 22.1 |

SGA= Small for Gestational age; AGA= Adequate for gestational age; LGA= Large for Gestational Age; RDS= respiratory distress

syndrome; NEC=Necrotizing Enterocolitis; CPAP= Continuous Positive Airway Pressure; GI IVH= Grade I Intraventricular Hemorrhage.

GII IVH= Grade II Intraventricular Hemorrhage; GIII IVH= Grade III Intraventricular Hemorrhage; GIV IVH= Grade IV Intraventricular

Hemorrhage; ROP= Retinopathy of prematurity; BPD= Bronchopulmonary dysplasia; PDA= persistent ductus arteriosus; LBW= Low Birth.
